# Supplementary material
Source: PubMed Central journal article supplement (PMC3924600)
Supplement: NIHMS277027-supplement-Supplemental.pdf [file NIHMS277027-supplement-Supplemental.pdf]

SUPPORTING INFORMATION:

*Biochemistry* (2010) DOI: 10.1021/bi1014375

A Comparison of Methanobactins from *Methylosinus trichosporium* OB3b and *Methylocystis* strain SB2 Predicts Methanobactins are Synthesized from Diverse Peptide Precursors Modified to Create a Common Core for Binding and Reducing Copper Ions

*Benjamin D. Krentz, Heidi J. Mulheron, Jeremy D. Semrau, Alan A. DiSpirito, Nathan Bandow, Daniel H. Haft, Stéphane Vuilleumier, J. Colin Murrell, Marcus T. McEllistrem, Scott C. Hartsel and Warren H. Gallagher*

---

[Figure S1](#): Mass spectrum for metal-free mb-SB2

[Figure S2](#): The proposed structure for mb-SB2 based on the NMR analysis, and a summary of the correlations observed in 2D NMR experiments

[Figure S3](#): The long-range  $^1\text{H}$ - $^{13}\text{C}$  correlations observed in an [ $^1\text{H}$ - $^{13}\text{C}$ ] HMBC spectrum for metal-free mb-SB2 after the hydrolysis and decarboxylation of its oxazolone ring.

[Table S1](#): The  $^1\text{H}$ ,  $^{13}\text{C}$  and  $^{15}\text{N}$  resonance assignments for Cu(I)-mb-SB2

[Table S2](#): The  $^1\text{H}$  and  $^{13}\text{C}$  resonance assignments for metal-free mb-SB2, before and after the hydrolysis and decarboxylation of its oxazolone ring.

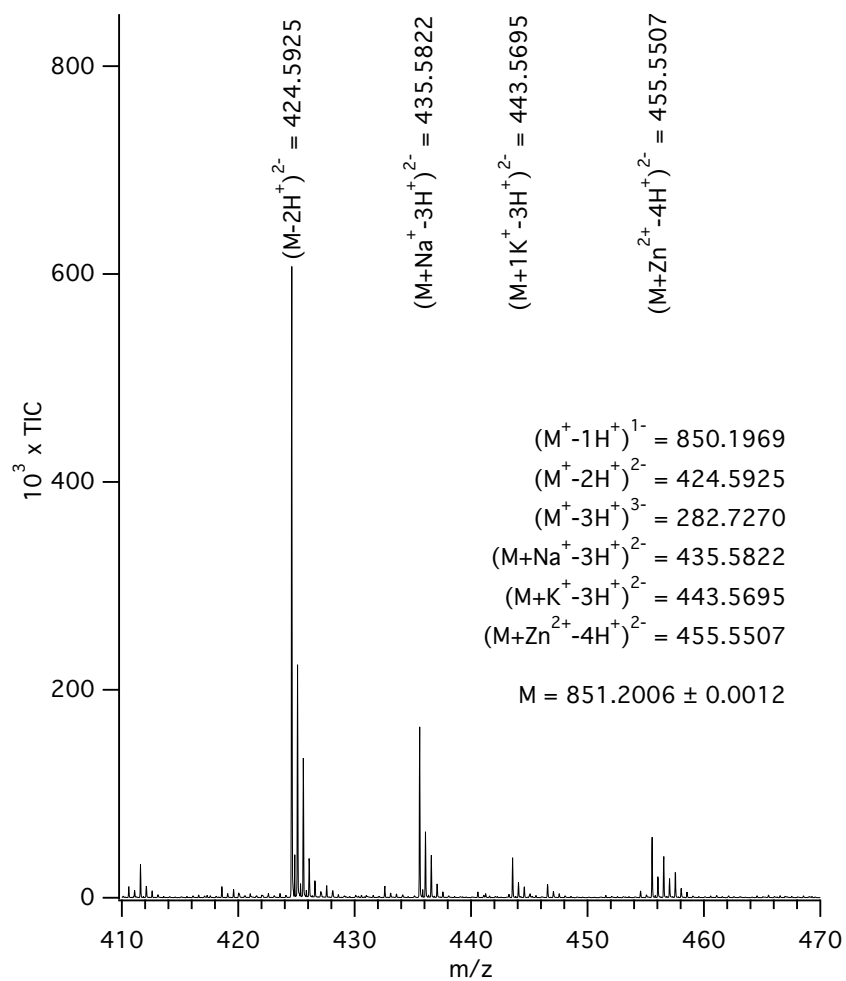

**FIGURE S1:** The mass spectrum of mb-SB2, focusing in on the  $m/z$  region containing -2 charged species. The  $m/z$  values used to calculate the neutral exact mass are shown and include the  $m/z$  values for the -1 and -3 charged formed (data not shown).



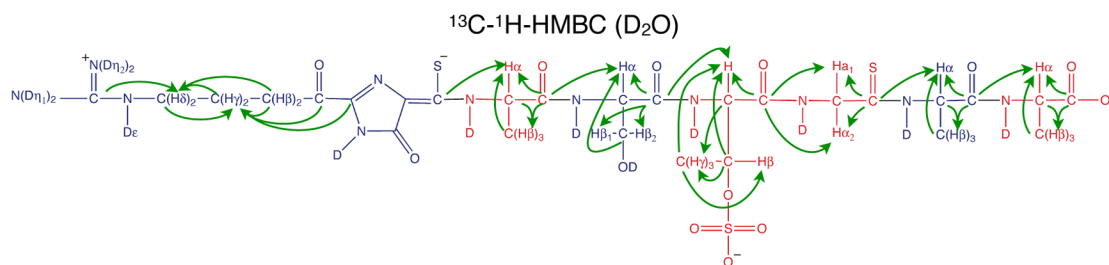

**Figure S3.** The long-range  $^1\text{H}$ - $^{13}\text{C}$  correlations observed in an  $^1\text{H}$ - $^{13}\text{C}$ -HMBC experiment that was run on the isolated product after hydrolysis and decarboxylation of the oxazolone B-ring in mb-SB2.

Table S1: <sup>1</sup>H, <sup>13</sup>C, and <sup>15</sup>N Resonance assignments for Cu<sup>+</sup>-bound methanobactin from *Methylocystis* species SB2

|                                   | Resonances (ppm)                         |                               |                                |                                           |  |
|-----------------------------------|------------------------------------------|-------------------------------|--------------------------------|-------------------------------------------|--|
|                                   | H <sub>2</sub> O - 5°C<br><sup>1</sup> H | DMSO - 25°C<br><sup>1</sup> H | DMSO - 25°C<br><sup>13</sup> C | H <sub>2</sub> O - 5°C<br><sup>15</sup> N |  |
| 4-Guanidino-<br>butanoyl-         | Atom                                     |                               |                                |                                           |  |
|                                   | C <sup>α</sup>                           |                               | 171.30                         |                                           |  |
|                                   | C <sup>β</sup>                           |                               | 30.92                          |                                           |  |
|                                   | C <sup>γ</sup>                           |                               | 27.88                          |                                           |  |
|                                   | C <sup>δ</sup>                           |                               | 40.60                          |                                           |  |
|                                   | N <sup>ε</sup>                           |                               |                                | 84.00                                     |  |
|                                   | C <sup>ζ</sup>                           |                               | N/A                            |                                           |  |
|                                   | N <sup>η1</sup>                          |                               |                                | 69.79                                     |  |
|                                   | N <sup>η2</sup>                          |                               |                                | 70.91                                     |  |
|                                   | H <sup>β1</sup>                          | 2.69                          | 2.91                           |                                           |  |
| H <sup>β2</sup>                   | 2.95                                     | 3.13                          |                                |                                           |  |
| H <sup>γ1</sup>                   | 1.65                                     | 1.80                          |                                |                                           |  |
| H <sup>γ2</sup>                   | 1.77                                     | 1.88                          |                                |                                           |  |
| H <sup>δ</sup>                    | 3.15                                     | 3.24                          |                                |                                           |  |
| H <sup>ε</sup>                    | 7.00                                     | 7.45                          |                                |                                           |  |
| H <sup>η1</sup>                   | 6.52                                     | 6.99                          |                                |                                           |  |
| H <sup>η2</sup>                   | 6.90                                     | 7.34                          |                                |                                           |  |
| Imidazolone A                     | N <sup>1</sup>                           |                               |                                | 174.04                                    |  |
|                                   | C <sup>2</sup>                           |                               | 139.24                         |                                           |  |
|                                   | N <sup>3</sup>                           |                               |                                | 292.08                                    |  |
|                                   | C <sup>4</sup>                           |                               | 107.10                         |                                           |  |
|                                   | C <sup>5</sup>                           |                               | 160.07                         |                                           |  |
|                                   | C <sup>6</sup>                           |                               | 188.04                         |                                           |  |
| Ala <sup>1</sup>                  | H <sup>1</sup>                           | 11.26                         | 11.34                          |                                           |  |
|                                   | N                                        |                               |                                | 144.67                                    |  |
|                                   | C                                        |                               | 172.25                         |                                           |  |
|                                   | C <sup>α</sup>                           |                               | 56.40                          |                                           |  |
| Ser <sup>2</sup>                  | C <sup>β</sup>                           |                               | 17.38                          |                                           |  |
|                                   | H <sup>N</sup>                           | 11.70                         | 12.21                          |                                           |  |
|                                   | H <sup>α</sup>                           | 4.59                          | 4.62                           |                                           |  |
|                                   | H <sup>β</sup>                           | 1.65                          | 1.69                           |                                           |  |
|                                   | N                                        |                               |                                | 110.99                                    |  |
|                                   | C                                        |                               | 170.18                         |                                           |  |
| Oxazolone B                       | C <sup>α</sup>                           |                               | 30.92                          |                                           |  |
|                                   | C <sup>β</sup>                           |                               | 27.88                          |                                           |  |
|                                   | H <sup>N</sup>                           | 7.40                          | 7.33                           |                                           |  |
|                                   | H <sup>α</sup>                           | 4.90                          | 4.78                           |                                           |  |
|                                   | H <sup>β</sup>                           | 3.81                          | 4.04                           |                                           |  |
|                                   | H <sup>γ</sup>                           | 1.01                          | 1.03                           |                                           |  |
| Ala <sup>3</sup>                  | C <sup>2</sup>                           |                               | 146.93                         |                                           |  |
|                                   | N <sup>3</sup>                           |                               |                                | 232.44                                    |  |
|                                   | C <sup>4</sup>                           |                               | 107.10                         |                                           |  |
|                                   | C <sup>5</sup>                           |                               | N/A                            |                                           |  |
|                                   | C <sup>6</sup>                           |                               | 179.83                         |                                           |  |
|                                   | N                                        |                               |                                | 128.85                                    |  |
| Ala <sup>4</sup>                  | C                                        |                               | 171.96                         |                                           |  |
|                                   | C <sup>α</sup>                           |                               | 52.52                          |                                           |  |
|                                   | C <sup>β</sup>                           |                               | 19.58                          |                                           |  |
|                                   | H <sup>N</sup>                           | 8.23                          | 8.77                           |                                           |  |
|                                   | H <sup>α</sup>                           | 4.81                          | 5.11                           |                                           |  |
|                                   | H <sup>β</sup>                           | 1.59                          | 1.61                           |                                           |  |
| 1-Amino-<br>2-hydroxy-<br>propyl- | N                                        |                               |                                | 173.95                                    |  |
|                                   | C                                        |                               |                                | 47.80                                     |  |
|                                   | C <sup>α</sup>                           |                               |                                | 17.26                                     |  |
|                                   | C <sup>β</sup>                           |                               |                                |                                           |  |
|                                   | H <sup>N</sup>                           | 8.45                          | 8.79                           |                                           |  |
|                                   | H <sup>α</sup>                           | 4.10                          | 4.46                           |                                           |  |
| 1-Amino-<br>2-hydroxy-<br>propyl- | H <sup>β</sup>                           | 1.35                          | 1.51                           |                                           |  |
|                                   | N                                        |                               |                                | 129.96                                    |  |
|                                   | C                                        |                               |                                |                                           |  |
|                                   | C <sup>α</sup>                           |                               |                                |                                           |  |
|                                   | C <sup>β</sup>                           |                               |                                |                                           |  |
|                                   | H <sup>N</sup>                           | 8.45                          | 8.79                           |                                           |  |
| 1-Amino-<br>2-hydroxy-<br>propyl- | H <sup>α</sup>                           | 4.10                          | 4.46                           |                                           |  |
|                                   | H <sup>β</sup>                           | 1.35                          | 1.51                           |                                           |  |
|                                   | N                                        |                               |                                | 129.96                                    |  |
|                                   | C                                        |                               |                                |                                           |  |
|                                   | C <sup>α</sup>                           |                               |                                |                                           |  |
|                                   | C <sup>β</sup>                           |                               |                                |                                           |  |

Table S2: <sup>1</sup>H and <sup>13</sup>C Resonance assignments for metal-free methanobactin from *Methylocystis* species SB2 after hydrolysis of the Oxazolone B ring. Data were collected in either H<sub>2</sub>O/D<sub>2</sub>O or D<sub>2</sub>O at 5°C.\*

|                           | Atom            | Resonances (ppm)            |                 |                | Atom             | Resonances (ppm)              |                 |
|---------------------------|-----------------|-----------------------------|-----------------|----------------|------------------|-------------------------------|-----------------|
|                           |                 | <sup>1</sup> H              | <sup>13</sup> C |                |                  | <sup>1</sup> H                | <sup>13</sup> C |
| 4-Guanidino-<br>butanoyl- | C <sup>α</sup>  |                             | 180.85          |                | Thr <sup>B</sup> | C                             | 170.55          |
|                           | C <sup>β</sup>  |                             | 27.94 (27.57)   |                | C <sup>α</sup>   | <b>57.82</b> ( <b>51.91</b> ) |                 |
|                           | C <sup>γ</sup>  |                             | 25.43 (25.51)   |                | C <sup>β</sup>   | 74.72 (75.48)                 |                 |
|                           | C <sup>δ</sup>  |                             | 40.37 (40.11)   |                | C <sup>γ</sup>   | 16.99 (16.99)                 |                 |
|                           | C <sup>ε</sup>  |                             | 156.06          |                | H <sup>N</sup>   | 8.44                          |                 |
|                           | H <sup>β1</sup> | 2.70 (2.60)                 |                 |                | H <sup>α</sup>   | <b>4.55</b> ( <b>4.94</b> )   |                 |
|                           | H <sup>β1</sup> | 2.70 (2.77)                 |                 |                | H <sup>β</sup>   | <b>4.89</b> ( <b>4.77</b> )   |                 |
|                           | H <sup>γ</sup>  | 1.91 (1.89)                 |                 |                | H <sup>γ</sup>   | 1.39 (1.35)                   |                 |
|                           | H <sup>δ</sup>  | 3.23 (3.22)                 |                 |                |                  |                               |                 |
|                           | H <sup>ε</sup>  | 7.36                        |                 |                | Gly <sup>B</sup> | C                             | <b>199.83</b>   |
|                           | H <sup>η1</sup> | 6.37                        |                 |                | C <sup>α</sup>   | <b>49.30</b>                  |                 |
| H <sup>η2</sup>           | 6.91            |                             |                 | H <sup>N</sup> | <b>8.55</b>      |                               |                 |
| Imidazolone A             | C <sup>2</sup>  |                             | 138.78          |                | H <sup>α1</sup>  | <b>4.23</b>                   |                 |
|                           | C <sup>6</sup>  |                             | 190.92          |                | H <sup>α2</sup>  | <b>4.33</b>                   |                 |
|                           | H <sup>1</sup>  | 11.15                       |                 |                |                  |                               |                 |
| Ala <sup>1</sup>          | C               |                             | 175.46          |                | Ala <sup>3</sup> | C                             | 172.20          |
|                           | C <sup>α</sup>  |                             | 55.00 (55.36)   |                | C <sup>α</sup>   | <b>55.00</b> ( <b>52.98</b> ) |                 |
|                           | C <sup>β</sup>  |                             | 17.07 (16.75)   |                | C <sup>β</sup>   | 17.07 (17.40)                 |                 |
|                           | H <sup>N</sup>  | 11.81                       |                 |                | H <sup>N</sup>   | 9.54                          |                 |
|                           | H <sup>α</sup>  | <b>4.90</b> ( <b>4.80</b> ) |                 |                | H <sup>α</sup>   | <b>4.81</b> ( <b>4.92</b> )   |                 |
| Ser <sup>2</sup>          | H <sup>β</sup>  | 1.58 (1.58)                 |                 |                | H <sup>β</sup>   | 1.49 (1.49)                   |                 |
|                           | C               |                             | 172.02          |                | Ala <sup>4</sup> | C                             | 179.69          |
|                           | C <sup>α</sup>  |                             | 55.26 (55.37)   |                | C <sup>α</sup>   | 50.78 (50.83)                 |                 |
|                           | C <sup>β</sup>  |                             | 60.50 (60.56)   |                | C <sup>β</sup>   | 16.84 (17.09)                 |                 |
|                           | H <sup>N</sup>  | 8.54                        |                 |                | H <sup>N</sup>   | 8.20                          |                 |
|                           | H <sup>α</sup>  | 4.55 (4.54)                 |                 |                | H <sup>α</sup>   | 4.10 (4.11)                   |                 |
|                           | H <sup>β1</sup> | 3.89 (3.91)                 |                 |                | H <sup>β</sup>   | 1.32 (1.33)                   |                 |
| H <sup>β2</sup>           | 3.93 (3.91)     |                             |                 |                |                  |                               |                 |

\* The values in parentheses are the corresponding assignments for unhydrolyzed mb-SB2 in D<sub>2</sub>O at 5°C. The values highlighted in bold type are those values that differ more than 1.0 ppm for <sup>13</sup>C and 0.1 ppm for <sup>1</sup>H.
